# Supplementary material for: Characterization of an activated iridium water splitting catalyst using infrared photodissociation of H2 tagged ions
Source: Royal Society of Chemistry journal article supplement (doi:10.1039/c2cp41490b), 2012-01-01
Supplement: c2cp41490b.pdf [file c2cp41490b.pdf]

## **Electronic Supplementary information**

### **Characterization of an activated iridium water splitting catalyst using infrared photodissociation of H<sub>2</sub> tagged ions.**

Etienne Garand, Joseph Fournier, Michael Z. Kamrath, Nathan D. Schley, Robert H. Crabtree  
and Mark A. Johnson

*Sterling Chemistry Laboratory, Yale University, P.O. Box 208107, New Haven, CT 06520*

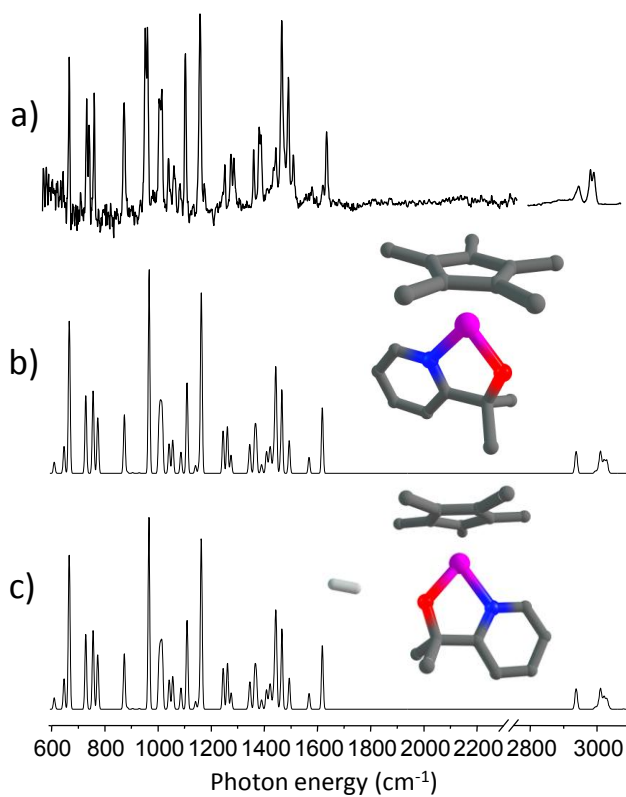

**Figure S1:** a)  $\text{H}_2$  predissociation spectrum of  $1 \cdot 2\text{H}_2$  and calculated (cam-B3LYP/SDD/6-311++G(d,p) level) structures and harmonic spectra of b) bare  $1$ , c)  $1 \cdot \text{H}_2$
